# Supplementary material for: Irisin inhibits pancreatic cancer cell growth via the AMPK-mTOR pathway
Source: PubMed Central journal article supplement (PMC6189061; doi:10.1038/s41598-018-33229-w), 2018-10-15
Supplement: 41598_2018_33229_MOESM1_ESM.pdf [file 41598_2018_33229_MOESM1_ESM.pdf]

## **Irisin inhibits pancreatic cancer cell growth via the AMPK-mTOR pathway**

**Jiayu Liu<sup>1,2</sup>, Nannan Song<sup>1,2</sup>, Yibing Huang<sup>1,2</sup>, Yuxin Chen<sup>1,2\*</sup>**

**1** Key Laboratory for Molecular Enzymology and Engineering of the Ministry of Education, Jilin University, 2699 Qianjin Street, Changchun, 130012, China

**2** School of Life Sciences, Jilin University, Changchun, 130012, China

**\*Corresponding Author:** Yuxin Chen, Key Laboratory for Molecular Enzymology and Engineering of the Ministry of Education, Jilin University, 2699 Qianjin St., Changchun, Jilin, P. R. China 130012. Tel.: +86-431-85155220 Fax: +86-431-85155200 Email: chen\_yuxin@jlu.edu.cn.

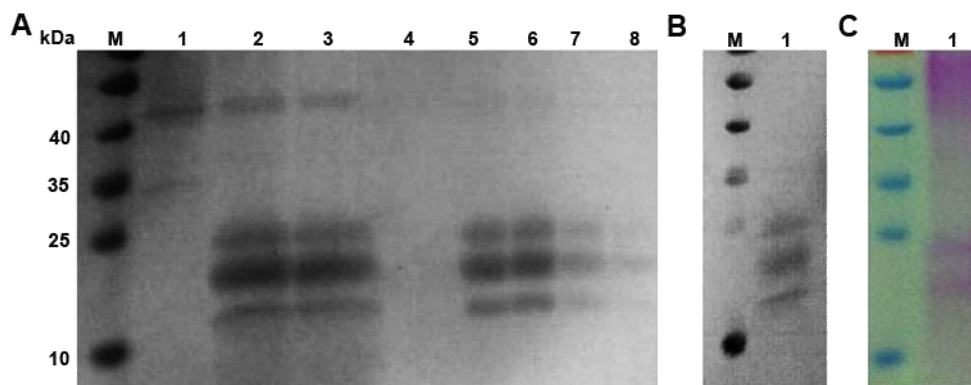

**Supplementary Figure S1: Expression and purification of human recombinant glycosylated E-irisin** **A.** SDS-PAGE analysis of expression of recombinant E-irisin in GS115-pPIC9k-E-irisin *Pichia pastoris* transformants and purification of E-irisin from *Pichia pastoris* transformants culture. Lanes: M protein marker. 1 the cultured supernatant of *Pichia pastoris* transformants before induction (negative control). 2 the cultured supernatant of *Pichia pastoris* transformants after induced with 5% methanol, (before passing Ni affinity column). 3 sample after passing Ni affinity column. 4 the washout of the Ni affinity column with 70 mM imidazole. 5-8 the washout of the Ni affinity column with 300 mM imidazole. **B:** The target E-irisin protein was verified by western blotting using anti-irisin antibody: Lanes: M protein marker. 1 the purified E-irisin. Three protein bands with molecular mass about 17, 20 and 25 kDa. **C:** The purified E-irisin stained by periodic acid-Schiff. Lanes: M protein marker. 1 the purified E-irisin. Two higher molecular weights (25 and 20 kDa) of the secreted protein were dyed purple by acid-Schiff.

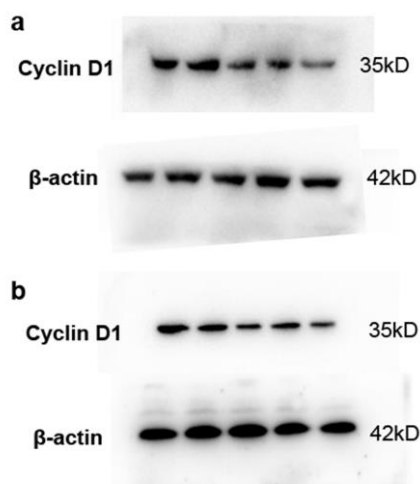

**Supplementary Figure S2: The full length Western blotting images for the cropped images shown in Fig. 2D.** Western blotting analysis for the expression level of the cell cycle regulatory protein, cyclin D1, after treatment with irisin.  $\beta$ -actin was used as the loading control. MIA PaCa-2 (**a**) and Panc03.27 (**b**).

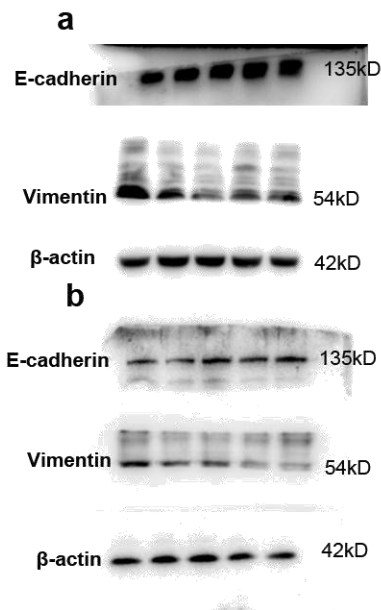

**Supplementary Figure S3: The full length Western blotting images for the cropped images shown in Fig. 3C.** Western blotting analysis for the expression level of EMT markers (E-cadherin and vimentin) in MIA PaCa-2 (**a**) and Panc03.27 (**b**) cells after treatment with irisin.  $\beta$ -actin was used as the loading control.

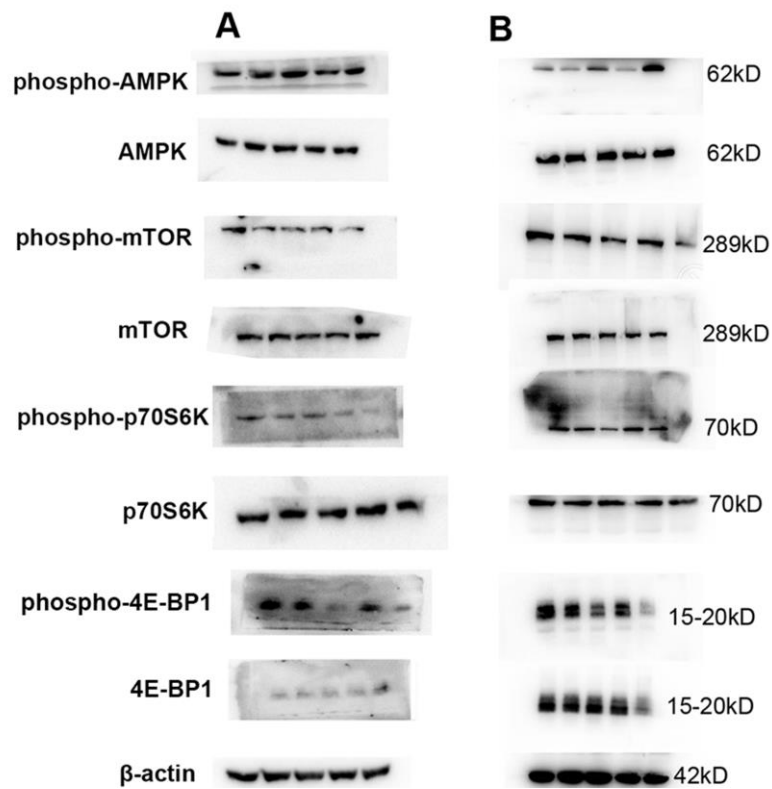

**Supplementary Figure S4: The full length Western blotting images for the cropped images shown in Fig. 4.** The phosphorylated (Thr172) and total AMPK, phosphorylat-

ed (Ser2448) and total mTOR, phosphorylated (Thr389) and total p70S6 kinase, and phosphorylated (Thr37/46) and total 4E-BP1 proteins of MIA PaCa-2 (**A**) and Panc03.27 (**B**) cells were detected using Western blotting analysis after treatment with E-irisin or P-irisin for 24 h.  $\beta$ -actin was used as the loading control.
